# Supplementary material for: Ultra-thin atom layer deposited alumina film enables the precise lifetime control of fully biodegradable electronic devices
Source: Royal Society of Chemistry journal article supplement (doi:10.1039/c9nr06566k), 2019-01-01
Supplement: c9nr06566k1.pdf [file c9nr06566k1.pdf]

Electronic Supplementary Information for  
**Ultra-thin Atom Layer Deposited Alumina Film Enables Precise Lifetime Control of Fully Biodegradable Electronic Devices**

Shuyi Huang,<sup>a</sup> Weipeng Xuan,<sup>b</sup> Shuting Liu,<sup>a</sup> Xiang Tao,<sup>a</sup> Hongsheng Xu,<sup>a</sup> Shijie Zhan,<sup>c</sup> Jinkai Chen,<sup>b</sup> Zhen Cao,<sup>\*a</sup> Hao Jin,<sup>a</sup> Shurong Dong,<sup>a</sup> Hang Zhou,<sup>d</sup> Xiaozhi Wang,<sup>\*a</sup> Jong Min Kim,<sup>c</sup> Jikui Luo<sup>a,e</sup>

<sup>a</sup>. *Key Laboratory of Micro-nano Electronic Devices and Smart Systems of Zhejiang Province, College of Information Science & Electronic Engineering, Zhejiang University, Hangzhou 310027, China.*

<sup>b</sup>. *Key Laboratory of RF Circuits and Systems, Ministry of Education. College of Electronics & Information, Hangzhou Dianzi University, Hangzhou 310018, China.*

<sup>c</sup>. *Department of Engineering, University of Cambridge, 9 JJ Thomson Avenue, Cambridge, CB3 0FA UK.*

<sup>d</sup>. *School of Electronic and Computer Engineering, Peking University Shenzhen Graduate School, Shenzhen, 518055, China.*

<sup>e</sup>. *Institute for Renewable Energy and Environmental Technologies, University of Bolton, Deane Road, Bolton BL3 5AB, UK.*

## **CONTENTS**

**Part 1:** Brief introduction to the mass loading effect

**Part 2:** XRD spectrum of alumina film

**Part 3:** Properties of ZnO thin films

## 1. Brief introduction to the mass loading effect

For mass loading-based resonant sensors, the relationship between the resonant frequency shift,  $\Delta f$ , and the mass change,  $\Delta m$ , is expressed by Sauerbrey equation as follows,<sup>1</sup>

$$\Delta f = \left( -2.3 + 10^6 \times \frac{f_0^2}{A} \right) \Delta m \quad (S1)$$

where  $A$  is the active surface area,  $f_0$  is the original resonant frequency of the SAW device. It indicates that the frequency shift,  $\Delta f$ , is mainly determined by  $\Delta m$  for fixed  $A$  and  $f_0$ . In the case of humidity responses, the mass change is determined by the condensation of water vapor on the active area on the surface of delay-line type SAW device. Equation S1 indicates that more condensation of water vapor will result in more significant frequency shift.

## 2. XRD spectrum of alumina film

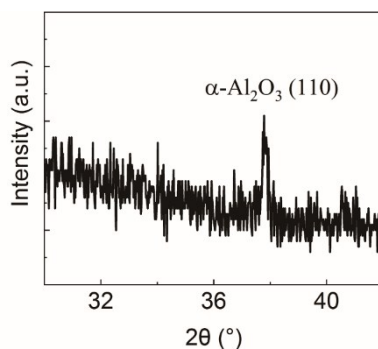

**Figure S1.** An XRD spectrum of the alumina film deposited by ALD, which shows the (110) crystal orientation of  $\alpha$ -Al<sub>2</sub>O<sub>3</sub>.

Alumina has more than ten types of isomorphous crystals, and most common types are  $\alpha$ -Al<sub>2</sub>O<sub>3</sub>,  $\beta$ -Al<sub>2</sub>O<sub>3</sub> and  $\gamma$ -Al<sub>2</sub>O<sub>3</sub>. Figure S1 shows an XRD pattern of the alumina film deposited by ALD method, the dominant peak at 37.78° indicates (110) crystal

orientation of  $\alpha$ - $\text{Al}_2\text{O}_3$ , which is the most suitable type of  $\text{Al}_2\text{O}_3$  material for this work as they have the smallest lattice mismatch with ZnO film at the interface.<sup>2</sup>

### 3. Properties of ZnO thin films

High quality ZnO thin film is essential for fabricating high-performance ZnO-based Surface Acoustic Wave (SAW) devices. Figure S2a shows an atomic force microscope (AFM) image of the surface of ZnO film with a scanning area of  $2 \times 2 \mu\text{m}^2$ , the root mean square roughness is about 5.2 nm. The sputtering deposited ZnO film is columnar structure along the c-axis, and the AFM image confirms that the top-view surface morphology of ZnO film is a cell-unit like shape. Figure S2b shows an X-ray diffraction (XRD) pattern of the ZnO film with a dominant peak at  $\sim 34^\circ$ , the peak confirms the (002) crystalline orientation of ZnO, which is critical for ZnO film to obtain high piezoelectric effect. The full-width at half-maximum (FWHM) is  $0.184^\circ$ , and an average grain size was calculated to be  $\sim 45$  nm using the Scherrer Equation.<sup>3</sup>

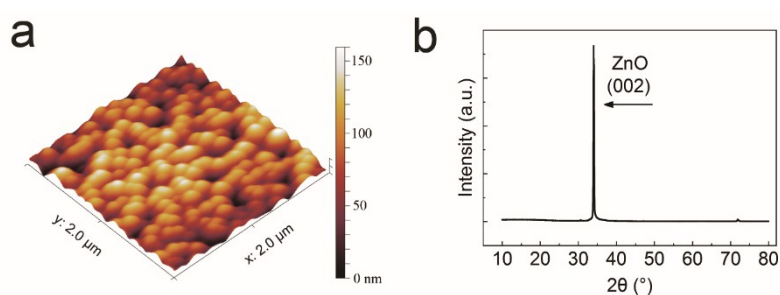

**Figure S2.** (a) An AFM image of the surface of ZnO film with a scanning area of  $2 \times 2 \mu\text{m}^2$ . (b) An XRD spectrum of the ZnO film, showing a good c-axis orientation;

## References

1. G. Sauerbrey, *Zeitschrift fr Physik*, 1959, **155**, 206-222.
2. N. W. Emanetoglu, C. Gorla, Y. Liu, S. Liang and Y. Lu, *Mater. Sci. Semicond. Process.*, 1999, **2**, 247-252.
3. J. I. Langford and A. Wilson, *J. Appl. Cryst*, 1978, **11**, 102-113.
